# Supplementary material
Source: HighWire-hosted journal article supplement (https://emj.bmj.com/content/34/9/578)

## Supplementary file 2

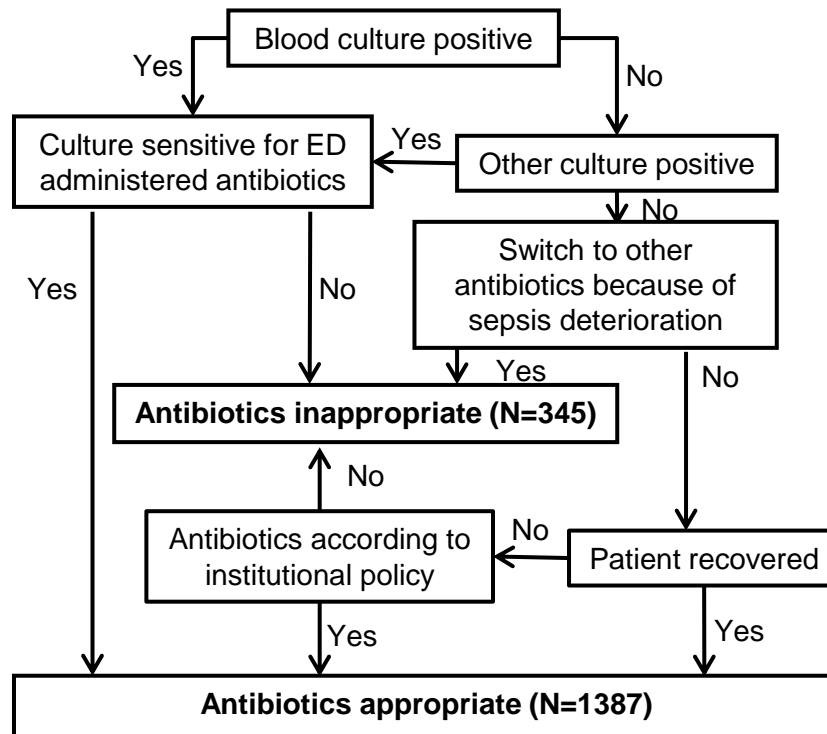

Supplement: inline-supplementary-material-2 [file inline-supplementary-material-2.pdf]
